# Supplementary material for: Increased expression levels of inflammatory cytokines and adhesion molecules in lipopolysaccharide-induced acute inflammatory apoM−/− mice
Source: PubMed Central journal article supplement — Mol Med Rep. 2020 Aug 11;22(4):3117–26. doi: 10.3892/mmr.2020.11426 (PMC7453663; doi:10.3892/mmr.2020.11426), 2020-08-11

Figure S1. PCR amplification curves. (A) *apoM*<sup>+/+</sup> amplification curves (FAM channel, 465-510 nm). (B) *apoM*<sup>-/-</sup> amplification curves (CY5 channel, 618-660 nm). (C and D) *apoM*<sup>+/-</sup> amplification curves (FAM channel, 465-510 nm; CY5 channel, 618-660 nm). apoM, apolipoprotein M.

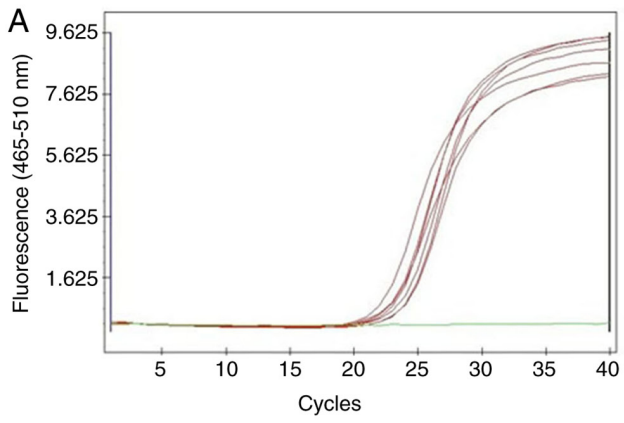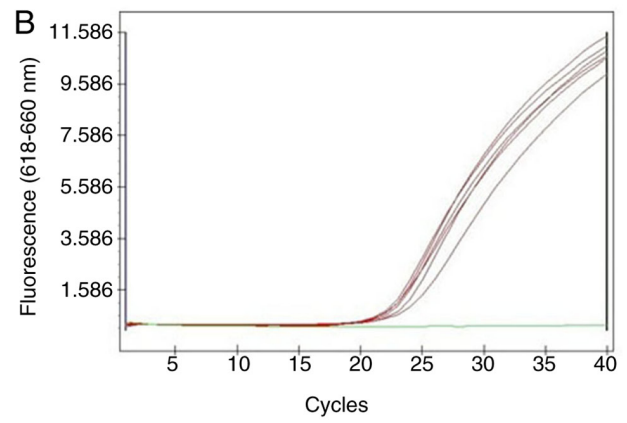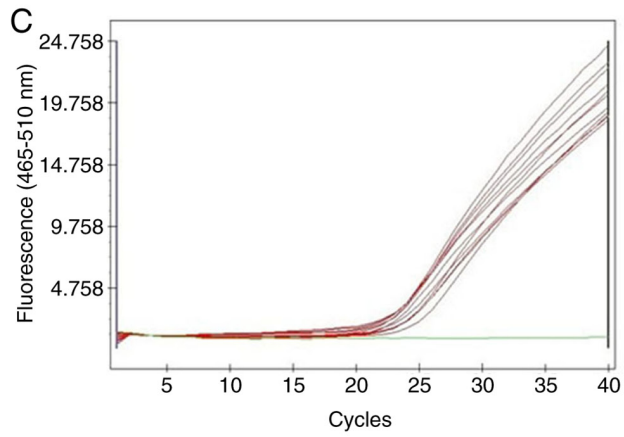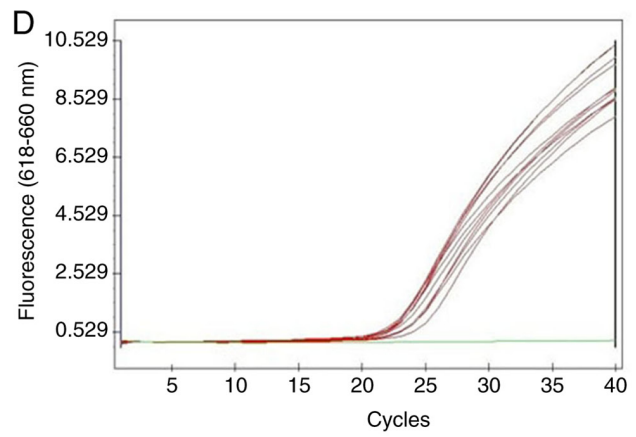

Figure S2. PCR product sequencing analysis. PCR product sequences for (A) *apoM*<sup>+/+</sup> and (B) *apoM*<sup>-/-</sup> recombinant plasmids. The arrows indicate the primer start site. apoM, apolipoprotein M.

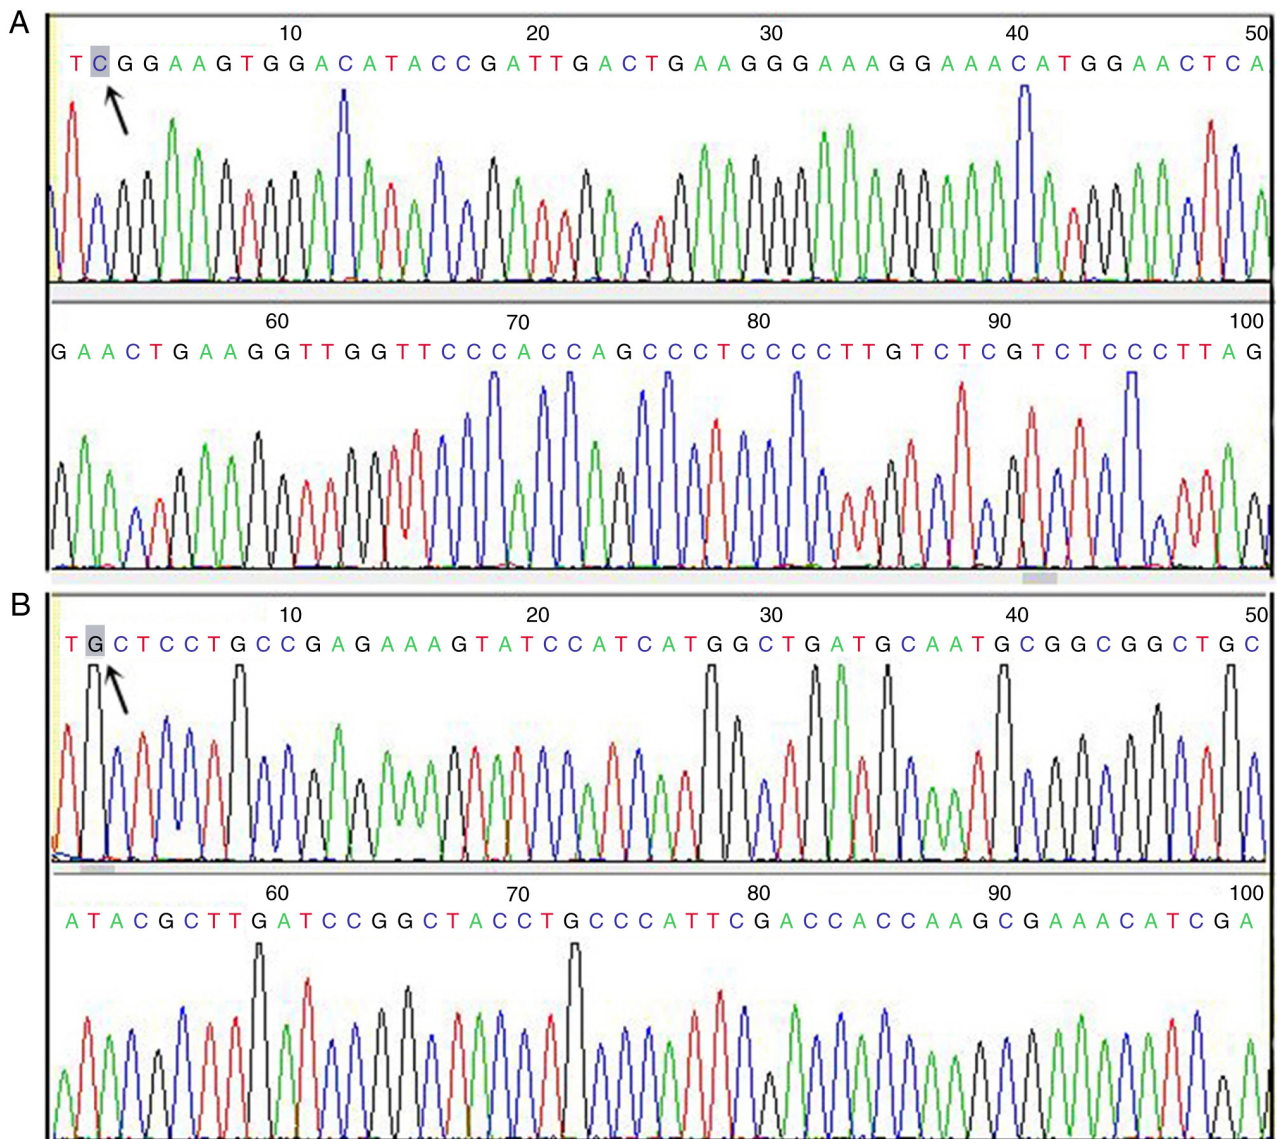

Supplement: Supplementary_Data.pdf [file Supplementary_Data.pdf]
